# Supplementary material for: Top-Down Proteomics Detection of Potential Salivary Biomarkers for Autoimmune Liver Diseases Classification
Source: MDPI journal article supplement (doi:10.3390/ijms24020959), 2023-01-04
Supplement: s1 [file s1]

**Table S1:** UniProt-KB code, experimental and theoretical average mass values (Mav)  $\pm$  standard deviations (SD), elution times of proteins and peptides analyzed, m/z values and charge of the multiply charged ions selected for XIC search in HPLC-low resolution MS and their PTMs and characterized by High resolution MS [41].

| Proteins/peptides<br>(UniProt-KB<br>code) | El. Time<br>(min $\pm$<br>0.5) | Exper. (theor)<br>Mav $\pm$ SD | m/z (charge)<br>for XIC search                                       | PTMs                                                                                             |
|-------------------------------------------|--------------------------------|--------------------------------|----------------------------------------------------------------------|--------------------------------------------------------------------------------------------------|
| <b>Acid Proline-Rich Proteins</b>         |                                |                                |                                                                      |                                                                                                  |
| PRP-1 2P <sup>a</sup><br>(P02810)         | 22.2                           | 15515 $\pm$ 2<br>(15514-15515) | 1293.9(+12), 1194.4(+13),<br>1035.3(+15), 970.7(+16),<br>913.6(+17)  | N-Term(Gln->pyro-Glu),<br>S <sub>8</sub> (Phospho), S <sub>22</sub> (Phospho)                    |
| PRP-1 1P <sup>a</sup>                     | 22.9                           | 15435 $\pm$ 2<br>(15434-15435) | 1287.2(+12), 1188.3(+13),<br>1030.0(+15), 965.7(+16),<br>908.9(+17)  | N-Term(Gln->pyro-Glu),<br>S <sub>8</sub> or S <sub>22</sub> (Phospho)                            |
| PRP-1 0P <sup>a</sup>                     | 23.2                           | 15355 $\pm$ 2<br>(15354-15355) | 1280.5(+12), 1182.1(+13),<br>1024.6(+15), 960.7(+16),<br>904.2(+17)  | N-Term(Gln->pyro-Glu)                                                                            |
| PRP-1 3P <sup>a</sup>                     | 21.6                           | 15595 $\pm$ 2<br>(15594-15595) | 1418.7(+11), 1300.5(+12),<br>1200.6(+13), 1040.6(+15),<br>975.7(+16) | N-Term(Gln->pyro-Glu)<br>S <sub>8</sub> , S <sub>17</sub> , S <sub>22</sub> (Phospho)            |
| PRP-3 2P<br>(P02810)                      | 22.8                           | 11161 $\pm$ 1<br>(11161-11162) | 1595.5(+7), 1396.2(+8),<br>1015.7(+11), 931.1(+12),<br>859.6(+13)    | N-Term(Gln->pyro-Glu)<br>S <sub>8</sub> , S <sub>22</sub> (Phospho)<br>Fragment 1-106 of PRP-1   |
| PRP-3 1P <sup>a</sup>                     | 23.4                           | 11081 $\pm$ 1<br>(11081-11082) | 1584.1(+7), 1386.2(+8),<br>1008.4(+11), 924.5(+12),<br>853.4(+13)    | N-Term(Gln->pyro-Glu)<br>S <sub>8</sub> or S <sub>22</sub> (Phospho)                             |
| PRP-3 0P <sup>a</sup>                     | 23.8                           | 11001 $\pm$ 1<br>(11001-11002) | 1376.2(+8), 1101.2(+10),<br>917.8(+12) 786.8(+14)                    | N-Term(Gln->pyro-Glu)                                                                            |
| PRP-3 2P <sup>a</sup> desR <sub>106</sub> | 22.8                           | 11004 $\pm$ 1<br>(11005-11006) | 1573.2(+7), 1223.8(+9),<br>1001.5(+11), 847.6(+13)                   | N-Term(Gln->pyro-Glu)<br>S <sub>8</sub> , S <sub>22</sub> (Phospho), R <sub>106</sub><br>removal |
| P-C (P02810)                              | 15.0                           | 4370.9 $\pm$ 0.4<br>(4370.8)   | 1457.9(+3), 1093.7(+4)                                               | Fragment 107-150 of PRP-1                                                                        |
| <b>Statherin and PB</b>                   |                                |                                |                                                                      |                                                                                                  |
| Statherin<br>(P02808)                     | 29.2                           | 5380.0 $\pm$ 0.5<br>(5379.7)   | 1794.2(+3), 1345.9(+4),<br>1076.9(+5)                                | S <sup>2</sup> (Phospho); S <sup>3</sup> (Phospho)                                               |
| Statherin 1P <sup>a</sup>                 | 28.9                           | 5299.9 $\pm$ 0.5<br>(5299.7)   | 1767.6(+3), 1325.9(+4),<br>1060.9(+5)                                | S <sup>3</sup> (Phospho)                                                                         |
| P-B peptide<br>(P02814)                   | 30.0                           | 5792.9 $\pm$ 0.5<br>(5792.7)   | 1932.0(+3), 1449.2(+4),<br>1159.6(+5)                                | N-Term(Gln->pyro-Glu)                                                                            |
| <b>Histatins</b>                          |                                |                                |                                                                      |                                                                                                  |
| Hst-1 (P15515)                            | 21.9                           | 4928.2 $\pm$ 0.5<br>(4928.2)   | 1644.1(+3), 1233.5(+4)                                               | S <sup>2</sup> (Phospho)                                                                         |
| Hst-1 0P <sup>a</sup>                     | 22.0                           | 4848.2 $\pm$ 0.5<br>(4848.2)   | 1617.4(+3), 1213.5(+4)                                               |                                                                                                  |
| Hst-3 (P15516)                            | 17.7                           | 4062.2 $\pm$ 0.4<br>(4062.4)   | 1355.1(+3), 1016.6(+4)                                               |                                                                                                  |
| Hst-6                                     | 14.3                           | 3192.4 $\pm$ 0.3<br>(3192.5)   | 1065.1(+3), 799.1(+4)                                                | Fragment 1-25 of Hst-3                                                                           |
| Hst-5                                     | 14.6                           | 3036.5 $\pm$ 0.3<br>(3036.3)   | 1013.2(+3), 760.1(+4)                                                | Fragment 1-24 of Hst-3                                                                           |
| <b>Cystatins</b>                          |                                |                                |                                                                      |                                                                                                  |

|                                         |      |                            |                                                                                                  |                                                                                                               |
|-----------------------------------------|------|----------------------------|--------------------------------------------------------------------------------------------------|---------------------------------------------------------------------------------------------------------------|
| Cystatin A<br>(P01040)                  | 31.8 | 11005.354 ± 2<br>(11006.5) | 1001.59(+11), 1101.59(+10),<br>1223.94(+9), 1376.81(+8),<br>1573.36(+7), 1835.42(+6)             |                                                                                                               |
| Cystatin A acetyl <sup>b</sup>          | 33   | 11047.43 ± 2<br>(11048.5)  | 1005.41(+11), 1105.85(+10),<br>1228.61(+9), 1382.06(+8),<br>1579.36(+7), 1842.42(+6)             | N-Term.-α-Acetylation                                                                                         |
| Cystatin A<br>(T96→M)                   | 29.5 | 11036 ± 2,<br>11036.7      | 1840.45(+6) 1577.68(+7)<br>1380.59(+8) 1227.31(+9)<br>1104.68(+10)                               |                                                                                                               |
| Cystatin B-SSG <sup>c</sup><br>(P04080) | 32.8 | 11485.8 ± 2<br>(11486.9)   | 1915.5(+6), 1642.0(+7),<br>1436.9(+8), 1277.3(+9),<br>1149.7(+10), 1045.3(+11)                   | C3Glutathionylation                                                                                           |
| Cystatin B-SSC <sup>d</sup>             | 32.9 | 11299.8 ± 2<br>(11300.7)   | 1884.5(+6), 1615.4(+7),<br>1413.6(+8), 1256.7(+9),<br>1131.1(+10), 1028.6(+11)                   | C3Cysteinylation                                                                                              |
| Cystatin C<br>(P01034)                  | 35.1 | 13342 ± 2<br>(13343.1)     | 1483.57(+9), 1335.32(+10),<br>1214.02(+11), 1112.93(+12),<br>1027.40(+13)                        | 2 intrachain disulfide<br>bridges                                                                             |
| Cystatin D-R26<br>des1-5 (P28325)       | 37.7 | 13517 ± 2<br>(13517.3)     | 1690.70(+8), 1502.90(+9),<br>1352.70 (+10), 1229.80 (+11),<br>1127.4 (+12), 1040.40 (+13)        | N-Term(Gln->pyro-Glu)<br>after 1-5 residue removal,<br>2 intrachain disulfide<br>bridges                      |
| <b>Cystatins S-type</b>                 |      |                            |                                                                                                  |                                                                                                               |
| Cystatin S                              | 35.3 | 14186 ± 2<br>(14185)       | 1774.3(+8), 1577.2(+9),<br>1419.6(+10), 1290.6(+11),<br>1183.2(+12), 1092.2(+13),<br>1014.3(+14) | 2 intrachain disulfide<br>bridges                                                                             |
| Cystatin S1<br>(P01036)                 | 35.3 | 14266 ± 2<br>(14265)       | 1784.3(+8), 1586.1(+9),<br>1427.6(+10), 1297.9(+11),<br>1189.8(+12), 1098.4(+13),<br>1020.0(+14) | S <sup>3</sup> (Phospo) on cystatin S,<br>2 intrachain disulfide<br>bridges                                   |
| Cystatin S1 ox                          | 35.3 | 14281 ± 2<br>(14280.7)     | 1786.40(+8), 1589.70 (+9),<br>1429.30 (+10), 1299.50 (+11),<br>1191.30 (+12), 1099.70 (+13)      | S <sup>3</sup> (Phospo), W <sup>23</sup><br>oxidation, 2 intrachain<br>disulfide<br>bridges                   |
| Cystatin S2                             | 35.3 | 14346 ± 2<br>(14345)       | 1794.3(+8), 1595.0(+9),<br>1435.6(+10), 1305.2(+11),<br>1196.5(+12), 1104.5(+13),<br>1025.7(+14) | S <sup>1</sup> , S <sup>3</sup> (di-Phospo) on cystat<br>S,<br>2 intrachain disulfide<br>bridges              |
| Cystatin S2 ox                          | 35.3 | 14360 ± 2<br>(14361)       | 1596.64(+9), 1437.08(+10),<br>1306.52(+11), 1197.73(+12),<br>1105.68(+13)                        | S <sup>1</sup> , S <sup>3</sup> (di-Phospo) on cystat<br>S,<br>2 intrachain disulfide bridge<br>W23 oxidation |
| Cystatin SN<br>(P01037)                 | 34.6 | 14312 ± 2<br>(14313)       | 1790.0(+8), 1591.2(+9),<br>1432.2(+10), 1302.1(+11),<br>1193.7(+12), 1101.9(+13),<br>1023.3(+14) | 2 intrachain disulfide<br>bridges                                                                             |
| Cystatin SN des<br>1-4                  |      |                            |                                                                                                  |                                                                                                               |

|                                                    |      |                        |                                                                                                  |                                                                                                                                                                                                       |
|----------------------------------------------------|------|------------------------|--------------------------------------------------------------------------------------------------|-------------------------------------------------------------------------------------------------------------------------------------------------------------------------------------------------------|
| Cystatin SN ox                                     | 34.6 | 14328 ± 2<br>(14328)   | 1792.30(+8), 1593.20 (+9),<br>1434.00 (+10), 1303.30 (+11),<br>1195.20 (+12), 1103.30 (+13)      | 2 intrachain disulfide<br>bridges, W23oxidation                                                                                                                                                       |
| Cystatin SA<br>(P09228)                            | 36.8 | 14347 ± 2<br>(14346)   | 1794.4(+8), 1595.1(+9),<br>1435.7(+10), 1305.3(+11),<br>1196.6(+12), 1104.6(+13),<br>1025.8(+14) | 1 intrachain disulfide<br>bridge                                                                                                                                                                      |
| <b>Antileukoproteinase</b>                         |      |                        |                                                                                                  |                                                                                                                                                                                                       |
| SLPI (P03973)                                      | 26.2 | 11702.2 ± 1<br>(11706) | 1952.64(+6), 1673.84(+7),<br>1464.73(+8), 1302.10(+9)                                            | 8 intrachain disulfide<br>bridges                                                                                                                                                                     |
| <b>α-Defensins</b>                                 |      |                        |                                                                                                  |                                                                                                                                                                                                       |
| α-defensin 1<br>(P59665)                           | 23.5 | 3442.5 ± 2<br>(3442.1) | 1772.03(+2), 1148.36(+3),<br>861.52(+4)                                                          | 2 intrachain disulfide<br>bridges                                                                                                                                                                     |
| α-defensin 2<br>(P59665/6)                         | 23.5 | 3370.4 ± 1<br>(3370.9) | 1686.49(+2), 1124.66(+3),<br>843.75(+4)                                                          | 2 intrachain disulfide<br>bridges                                                                                                                                                                     |
| α-defensin 3<br>(P59666)                           | 23.5 | 3485 ± 2<br>(3486.1)   | 1744.03(+2), 1163.03(+3),<br>872.52(+4)                                                          | 2 intrachain disulfide<br>bridges                                                                                                                                                                     |
| α-defensin 4<br>(P12838)                           | 27.2 | 33708 ± 1<br>(3709.4)  | 1855.71(+2), 1237.48(+3),<br>928.36(+4)                                                          | 2 intrachain disulfide<br>bridges                                                                                                                                                                     |
| <b>S100A proteins</b>                              |      |                        |                                                                                                  |                                                                                                                                                                                                       |
| S100A12 (P80511)                                   | 40.0 | 10444 ± 2<br>(10443.9) | 1306.5(+8), 1161.4(+9),<br>1045.4(+10), 950.4(+11)                                               | M1 removal                                                                                                                                                                                            |
| S100A7 D27<br>(P31151)                             | 37.0 | 11367 ± 2<br>(11367.8) | 1422.0(+8), 1264.1(+9),<br>1137.8(+10), 1034.4(+11)                                              | M <sup>1</sup> removal, N-Term.-α-<br>Acetylation,<br>D <sup>27</sup> variant                                                                                                                         |
| S100A8(P05109)                                     | 40.4 | 10833 ± 2<br>(10834.5) | 1355.3(+8), 1204.8(+9),<br>1084.5(+10), 985.9(+11)                                               |                                                                                                                                                                                                       |
| S100A9-short<br>(P06702)                           | 42.2 | 12690 ± 2<br>(12689.2) | 1410.9(+9), 1269.9(+10),<br>1154.6(+11), 1058.4(+12),<br>977.1(+13)                              | N-Term.-α-Acetylation<br>after 1-5 residue removal                                                                                                                                                    |
| S100A9-short 1P <sup>a</sup>                       | 42.2 | 12770 ± 2<br>(12769.2) | 1419.8(+9), 1277.9(+10),<br>1161.8(+11), 1065.1(+12),<br>983.3(+13)                              | N-Term.-α-Acetylation<br>after 1-5 residue removal,<br>T <sup>108</sup> (Phospho)                                                                                                                     |
| S100A9-short ox                                    | 41.3 | 12706 ± 2<br>(12705.2) | 1412.7(+9), 1271.5(+10),<br>1156.0(+11), 1059.8(+12),<br>978.3(+13)                              | N-Term.-α-Acetylation<br>after 1-5 residue removal,<br>M <sup>89</sup> or <sup>78</sup> or <sup>76</sup> or <sup>58</sup> oxidation                                                                   |
| S100A9-short 1P <sup>a</sup><br>ox                 | 41.3 | 12786 ± 2<br>(12785.2) | 1421.9(+9), 1279.5(+10),<br>1163.3(+11), 1066.4(+12),<br>984.5(+13)                              | N-Term.-α-Acetylation<br>after 1-5 residue removal,<br>T <sup>108</sup> (Phospho), M <sup>89</sup> or <sup>78</sup> or<br><sup>76</sup> or <sup>58</sup> oxidation                                    |
| S100A-long SSG <sup>c</sup>                        | 41.5 | 13459 ± 2<br>(13458.1) | 1346.8(+10), 1224.5(+11),<br>1122.5(+12), 1036.3(+13),<br>962.3(+14)                             | M1 removal, N-Term.-α-<br>Acetylation,<br>C <sup>2</sup> glutathionylation                                                                                                                            |
| S100A9-long SSG <sup>c</sup><br>1P <sup>a</sup>    | 41.5 | 13538 ± 2<br>(13538.1) | 1354.82(+10), 1231.75(+11),<br>1129.18(+12), 1042.40(+13),<br>968.02(+14)                        | M1 removal, N-Term.-α-<br>Acetylation,<br>C <sup>2</sup> glutathionylation, T <sup>108</sup><br>(Phospho)                                                                                             |
| S100A9-long SSG <sup>c</sup><br>1P <sup>a</sup> ox | 41.5 | 13555 ± 2<br>(13555.1) | 1507.13(+9), 1356.52(+10),<br>1233.29(+11), 1130.60(+12),<br>1043.71(+13)                        | M <sup>1</sup> removal, N-Term.-α-<br>Acetylation,<br>C <sup>2</sup> glutathionylation, T <sup>108</sup><br>(Phospho) M <sup>93</sup> or <sup>82</sup> or <sup>80</sup> or<br><sup>62</sup> oxidation |

|                              |  |  |  |  |
|------------------------------|--|--|--|--|
| S100A9-long SSC <sup>c</sup> |  |  |  |  |
|                              |  |  |  |  |

<sup>a</sup>Number of phosphorylated residues is indicated as 0P, 1P or 2P.

<sup>b</sup>Acetyl. indicates acetylated N-terminus

<sup>c</sup>SSG indicates a glutathionylated cysteine residue.

<sup>d</sup>SSC. indicates a cysteinylated cysteine residue.

**Table S2.** Demographic data of HCs, AIHp and PBCp involved in the study.

| HCs |     |     | AIHp |     |     | PBCp |     |     |
|-----|-----|-----|------|-----|-----|------|-----|-----|
| #   | age | sex | #    | age | sex | #    | age | sex |
| C1  | 34  | F   | A1   | 70  | F   | P1   | 60  | F   |
| C2  | 56  | F   | A2   | 70  | F   | P2   | 51  | F   |
| C3  | 42  | M   | A3   | 54  | F   | P3   | 58  | F   |
| C4  | 48  | F   | A4   | 57  | F   | P4   | 53  | F   |
| C5  | 47  | M   | A5   | 55  | F   | P5   | 64  | F   |
| C6  | 41  | F   | A6   | 45  | M   | P7   | 42  | F   |
| C7  | 44  | F   | A7   | 30  | F   | P8   | 42  | F   |
| C8  | 50  | M   | A8   | 74  | F   | P9   | 66  | F   |
| C10 | 41  | F   | A9   | 45  | F   | P11  | 55  | F   |
| C11 | 40  | F   | A10  | 53  | F   | P12  | 55  | F   |
| C12 | 43  | F   | A11  | 83  | F   | P13  | 51  | F   |
| C13 | 63  | F   | A12  | 55  | F   | P14  | 66  | F   |
| C14 | 65  | M   | A13  | 60  | F   | P15  | 41  | F   |
| C16 | 30  | F   | A14  | 44  | F   | P16  | 70  | F   |
| C17 | 31  | F   | A15  | 48  | F   | P17  | 46  | F   |
| C18 | 47  | M   | A16  | 67  | F   | P18  | 76  | F   |
| C19 | 41  | F   | A17  | 42  | F   | P19  | 70  | F   |
| C20 | 38  | F   | A18  | 36  | M   | P20  | 64  | F   |
| C21 | 33  | F   | A19  | 42  | M   | P21  | 55  | F   |
| C22 | 46  | F   | A20  | 74  | F   | P22  | 55  | F   |
| C23 | 51  | F   | A21  | 69  | F   | P23  | 52  | F   |
| C24 | 58  | M   | A22  | 29  | F   | P24  | 70  | M   |
| C25 | 39  | F   | A23  | 56  | F   | P25  | 68  | F   |
| C27 | 34  | F   | A24  | 52  | M   | P26  | 58  | F   |
| C28 | 62  | F   | A25  | 43  | F   | P27  | 81  | F   |
| C29 | 51  | F   | A26  | 52  | F   | P28  | 63  | F   |
| C30 | 58  | M   | A27  | 56  | F   | P29  | 61  | F   |
| C31 | 64  | F   | A28  | 43  | F   | P30  | 79  | F   |
| C32 | 56  | F   | A29  | 57  | F   | P31  | 66  | F   |
| C33 | 62  | F   | A30  | 37  | F   | P32  | 63  | F   |
| C34 | 67  | F   | A31  | 40  | F   | P33  | 66  | F   |
| C35 | 61  | F   | A32  | 64  | F   | P34  | 64  | F   |
| C36 | 64  | F   | A33  | 74  | F   | P35  | 55  | F   |
| C37 | 63  | F   | A34  | 68  | F   | P36  | 63  | F   |
| C38 | 63  | F   | A35  | 43  | F   | P37  | 68  | F   |
| C39 | 62  | F   | A36  | 51  | F   | P38  | 60  | F   |

**Table S3.** XIC peak areas (25th percentile, median and interquartile range) and frequencies of proteins and peptides analyzed among HCs, AIHp and PBCp. N refers to the list position of the same components in Tables 2 and S4.

| Components |                          | HCs           |          |           |          | AIHp          |          |           |          | PBCp          |          |           |          |
|------------|--------------------------|---------------|----------|-----------|----------|---------------|----------|-----------|----------|---------------|----------|-----------|----------|
| N          | Protein/peptide          | XIC Peak Area |          |           |          | XIC Peak Area |          |           |          | XIC Peak Area |          |           |          |
|            |                          | 25th perc     | median   | 75th perc | Freq/ 36 | 25th perc     | median   | 75th perc | Freq/ 36 | 25th perc     | median   | 75th perc | Freq/ 36 |
| 1          | S100A12                  | 1.00E+04      | 1.00E+04 | 5.31E+07  | 10       | 1.00E+04      | 1.00E+04 | 1.56E+08  | 15       | 1.00E+04      | 1.00E+04 | 1.00E+04  | 5        |
| 2          | S100A8                   | 1.00E+04      | 1.00E+04 | 1.00E+04  | 4        | 1.00E+04      | 1.00E+04 | 6.76E+07  | 10       | 1.00E+04      | 1.00E+04 | 1.00E+04  | 2        |
| 3          | S100A7D27                | 1.00E+04      | 1.00E+04 | 1.78E+06  | 9        | 1.00E+04      | 1.00E+04 | 1.45E+08  | 16       | 1.00E+04      | 1.00E+04 | 1.00E+04  | 4        |
| 4          | S100A9_s                 | 1.00E+04      | 1.71E+08 | 3.64E+08  | 24       | 1.00E+04      | 1.00E+04 | 6.60E+08  | 14       | 1.00E+04      | 1.00E+04 | 4.75E+08  | 12       |
| 5          | S100A9_s_ox              | 1.00E+04      | 9.73E+07 | 2.03E+08  | 23       | 1.00E+04      | 1.00E+04 | 1.05E+08  | 10       | 1.00E+04      | 1.00E+04 | 2.50E+07  | 9        |
| 6          | S100A9_s_p               | 1.00E+04      | 1.00E+04 | 9.19E+07  | 10       | 1.00E+04      | 1.00E+04 | 1.00E+04  | 5        | 1.00E+04      | 1.00E+04 | 1.00E+04  | 2        |
| 7          | S100A9_s_p_ox            | 1.00E+04      | 1.00E+04 | 1.00E+04  | 3        | 1.00E+04      | 1.00E+04 | 1.00E+04  | 4        | 1.00E+04      | 1.00E+04 | 1.00E+04  | 2        |
| 8          | Sum_S100A9_s_and_ox      | 5.98E+07      | 2.76E+08 | 5.00E+08  | 28       | 1.00E+04      | 1.00E+04 | 8.01E+08  | 16       | 1.00E+04      | 1.00E+04 | 6.12E+08  | 13       |
| 9          | Sum_S100A9_s_and_s_p     | 1.00E+04      | 2.64E+08 | 4.91E+08  | 24       | 1.00E+04      | 1.00E+04 | 1.04E+09  | 16       | 1.00E+04      | 1.00E+04 | 4.75E+08  | 12       |
| 10         | Sum_S100A9_s_p_and_p_ox  | 1.00E+04      | 1.00E+04 | 9.19E+07  | 10       | 1.00E+04      | 1.00E+04 | 1.00E+04  | 5        | 1.00E+04      | 1.00E+04 | 1.00E+04  | 2        |
| 11         | Sum_S100A9_s_ox_and_p_ox | 1.00E+04      | 1.01E+08 | 2.03E+08  | 24       | 1.00E+04      | 1.00E+04 | 3.16E+08  | 11       | 1.00E+04      | 1.00E+04 | 2.50E+07  | 9        |
| 12         | Sum_S100A9_s             | 5.98E+07      | 3.21E+08 | 6.52E+08  | 28       | 1.00E+04      | 1.00E+04 | 1.76E+09  | 17       | 1.00E+04      | 1.00E+04 | 6.32E+08  | 13       |
| 13         | S100A9_l_g               | 1.00E+04      | 1.00E+04 | 2.39E+08  | 17       | 1.00E+04      | 1.00E+04 | 6.27E+08  | 14       | 1.00E+04      | 1.00E+04 | 4.82E+07  | 10       |
| 14         | S100A9_l_g_p             | 1.00E+04      | 1.00E+04 | 1.00E+04  | 2        | 1.00E+04      | 1.00E+04 | 1.00E+04  | 4        | 1.00E+04      | 1.00E+04 | 1.00E+04  | 2        |
| 15         | S100A9_l_g_ox            | 1.00E+04      | 1.00E+04 | 5.47E+07  | 12       | 1.00E+04      | 1.00E+04 | 1.00E+04  | 6        | 1.00E+04      | 1.00E+04 | 1.00E+04  | 3        |
| 16         | Sum_S100A9_l_g           | 1.00E+04      | 4.62E+07 | 2.80E+08  | 19       | 1.00E+04      | 7.66E+07 | 1.19E+09  | 19       | 1.00E+04      | 1.00E+04 | 2.10E+08  | 12       |
| 17         | Cystatin_A               | 1.26E+08      | 2.02E+08 | 3.09E+08  | 34       | 1.69E+08      | 3.75E+08 | 9.75E+08  | 35       | 1.28E+08      | 2.06E+08 | 3.77E+08  | 35       |
| 18         | Cystatin_A_Acetyl        | 2.58E+07      | 5.40E+07 | 6.99E+07  | 29       | 1.00E+04      | 4.25E+07 | 1.00E+08  | 24       | 2.46E+07      | 4.88E+07 | 8.80E+07  | 32       |
| 19         | Cystatin_A_Acetyl_T96L   | 1.00E+04      | 1.00E+04 | 1.42E+07  | 11       | 1.00E+04      | 1.00E+04 | 1.49E+06  | 9        | 1.00E+04      | 1.00E+04 | 1.00E+04  | 8        |
| 20         | Sum_Cystatin_A           | 1.87E+08      | 2.88E+08 | 4.38E+08  | 34       | 2.11E+08      | 5.15E+08 | 1.24E+09  | 36       | 1.91E+08      | 2.99E+08 | 4.69E+08  | 35       |
| 21         | Cystatin_B_s_glut        | 3.01E+07      | 5.73E+07 | 9.57E+07  | 27       | 6.52E+06      | 5.00E+07 | 1.69E+08  | 27       | 8.41E+06      | 4.32E+07 | 1.13E+08  | 29       |
| 22         | Cystatin_B_s_cyst        | 1.00E+04      | 1.00E+04 | 1.36E+07  | 11       | 1.00E+04      | 1.00E+04 | 2.92E+07  | 12       | 1.00E+04      | 1.00E+04 | 4.50E+07  | 14       |
| 23         | Cystatin_B_S_Sdim er     | 1.00E+04      | 1.00E+04 | 6.12E+06  | 9        | 1.00E+04      | 1.00E+04 | 1.96E+07  | 12       | 1.00E+04      | 1.00E+04 | 1.00E+04  | 4        |
| 24         | Cystatin_B_s_CMC         | 1.00E+04      | 1.00E+04 | 1.00E+04  | 7        | 1.00E+04      | 1.00E+04 | 1.00E+04  | 3        | 1.00E+04      | 1.00E+04 | 1.00E+04  | 2        |
| 25         | Sum_Cystatin_B           | 4.74E+07      | 8.50E+07 | 1.74E+08  | 29       | 9.15E+06      | 5.45E+07 | 3.06E+08  | 29       | 1.11E+07      | 5.08E+07 | 1.83E+08  | 29       |
| 26         | Cystatin_C               | 1.00E+04      | 1.00E+04 | 8.15E+07  | 14       | 1.00E+04      | 1.00E+04 | 1.00E+04  | 6        | 1.00E+04      | 1.00E+04 | 1.00E+04  | 3        |

|    |                          |          |          |          |    |          |          |          |    |          |          |          |    |
|----|--------------------------|----------|----------|----------|----|----------|----------|----------|----|----------|----------|----------|----|
| 27 | Cystatin_D_des_1_5       | 1.00E+04 | 8.21E+07 | 1.62E+08 | 24 | 1.00E+04 | 1.00E+04 | 1.60E+08 | 13 | 1.00E+04 | 1.00E+04 | 1.23E+08 | 11 |
| 28 | Cystatin_S               | 4.68E+04 | 4.83E+07 | 1.00E+08 | 27 | 1.00E+04 | 8.81E+07 | 2.09E+08 | 22 | 1.00E+04 | 1.00E+04 | 5.61E+08 | 15 |
| 29 | Cystatin_S1              | 3.23E+08 | 8.16E+08 | 1.60E+09 | 32 | 6.55E+08 | 1.33E+09 | 2.40E+09 | 32 | 9.74E+08 | 4.66E+09 | 7.44E+09 | 31 |
| 30 | Cystatin_S2              | 7.48E+07 | 2.21E+08 | 4.81E+08 | 30 | 1.74E+08 | 3.99E+08 | 1.03E+09 | 28 | 6.33E+08 | 2.00E+09 | 3.32E+09 | 30 |
| 31 | Cystatin_SN              | 6.55E+08 | 1.45E+09 | 2.86E+09 | 33 | 1.09E+09 | 2.12E+09 | 4.60E+09 | 30 | 1.01E+09 | 5.23E+09 | 1.23E+10 | 33 |
| 32 | Cystatin_SN_des_1_4      | 1.00E+04 | 1.00E+04 | 1.14E+08 | 16 | 1.00E+04 | 1.39E+08 | 5.93E+08 | 21 | 1.00E+04 | 4.67E+07 | 2.03E+08 | 20 |
| 33 | Cystatin_SA              | 1.00E+04 | 2.74E+07 | 4.01E+08 | 18 | 1.00E+04 | 1.00E+04 | 5.82E+08 | 17 | 1.00E+04 | 1.00E+04 | 4.57E+08 | 15 |
| 34 | Cystatin_S1_ox           | 1.00E+04 | 1.00E+04 | 9.68E+07 | 14 | 1.00E+04 | 2.24E+08 | 7.21E+08 | 25 | 1.00E+04 | 1.00E+04 | 5.43E+08 | 13 |
| 35 | Cystatin_S2_ox           | 1.00E+04 | 1.00E+04 | 1.00E+04 | 3  | 1.00E+04 | 1.00E+04 | 2.14E+07 | 9  | 1.00E+04 | 1.00E+04 | 1.00E+04 | 6  |
| 36 | Cystatin_SN_ox           | 1.00E+04 | 1.00E+04 | 1.94E+08 | 16 | 1.00E+04 | 1.31E+08 | 5.64E+08 | 19 | 1.00E+04 | 9.25E+07 | 3.74E+08 | 21 |
| 37 | Sum_Cystatin_S1          | 3.64E+08 | 1.04E+09 | 1.61E+09 | 32 | 5.26E+08 | 1.08E+09 | 2.40E+09 | 32 | 1.60E+09 | 5.77E+09 | 8.15E+09 | 31 |
| 38 | Sum_Cystatin_S2          | 7.48E+07 | 2.21E+08 | 5.21E+08 | 30 | 1.89E+08 | 3.99E+08 | 1.12E+09 | 28 | 6.33E+08 | 2.05E+09 | 3.48E+09 | 31 |
| 39 | Sum_Cystatin_S_S1_S2     | 4.91E+08 | 1.52E+09 | 2.22E+09 | 32 | 6.56E+08 | 1.58E+09 | 3.86E+09 | 32 | 3.73E+09 | 8.40E+09 | 1.17E+10 | 34 |
| 40 | Sum_Cystatin_SN          | 9.27E+08 | 1.72E+09 | 3.38E+09 | 34 | 1.29E+09 | 2.72E+09 | 5.11E+09 | 30 | 1.29E+09 | 5.55E+09 | 1.25E+10 | 34 |
| 41 | Sum_Cystatin_SA          | 1.00E+03 | 3.96E+07 | 5.58E+08 | 36 | 1.00E+04 | 1.00E+04 | 5.82E+08 | 17 | 1.00E+04 | 1.00E+04 | 4.57E+08 | 15 |
| 42 | Hst_1                    | 1.00E+04 | 1.48E+08 | 5.47E+08 | 24 | 1.09E+08 | 3.54E+08 | 8.73E+08 | 29 | 1.28E+08 | 2.78E+08 | 5.03E+08 | 29 |
| 43 | Hst_1_0P                 | 1.00E+04 | 1.00E+04 | 1.00E+04 | 6  | 1.00E+04 | 1.00E+04 | 5.57E+06 | 9  | 1.00E+04 | 1.00E+04 | 1.00E+04 | 5  |
| 44 | Sum_Hst_1                | 1.00E+04 | 1.48E+08 | 5.65E+08 | 24 | 1.15E+08 | 3.99E+08 | 8.83E+08 | 29 | 1.28E+08 | 2.87E+08 | 5.03E+08 | 29 |
| 45 | Hst_6                    | 1.00E+04 | 5.43E+07 | 1.63E+08 | 21 | 5.24E+07 | 1.94E+08 | 4.82E+08 | 29 | 1.00E+04 | 1.07E+08 | 2.12E+08 | 25 |
| 46 | Hst_5                    | 8.40E+07 | 1.75E+08 | 5.18E+08 | 28 | 1.78E+08 | 4.62E+08 | 1.39E+09 | 30 | 7.78E+07 | 3.00E+08 | 4.53E+08 | 30 |
| 47 | Hst_3                    | 1.00E+04 | 1.00E+04 | 1.45E+08 | 14 | 1.00E+04 | 1.23E+08 | 5.45E+08 | 22 | 1.00E+04 | 1.00E+04 | 1.04E+07 | 9  |
| 48 | Sum_Hst_3                | 1.18E+08 | 2.35E+08 | 8.43E+08 | 29 | 3.37E+08 | 8.96E+08 | 2.32E+09 | 30 | 1.05E+08 | 4.71E+08 | 7.39E+08 | 30 |
| 49 | Sum_Hst                  | 1.30E+08 | 4.55E+08 | 1.40E+09 | 32 | 6.17E+08 | 1.48E+09 | 3.49E+09 | 30 | 3.66E+08 | 7.71E+08 | 1.19E+09 | 31 |
| 50 | $\alpha$ _defensin_1     | 9.55E+07 | 2.83E+08 | 5.64E+08 | 35 | 9.58E+07 | 2.55E+08 | 7.33E+08 | 34 | 1.12E+08 | 3.12E+08 | 5.89E+08 | 34 |
| 51 | $\alpha$ _defensin_2     | 5.95E+07 | 1.72E+08 | 4.27E+08 | 35 | 6.74E+07 | 1.95E+08 | 5.21E+08 | 30 | 7.11E+07 | 1.92E+08 | 3.38E+08 | 32 |
| 52 | $\alpha$ _defensin_3     | 1.00E+04 | 6.63E+07 | 2.06E+08 | 25 | 1.00E+04 | 5.79E+07 | 2.85E+08 | 21 | 1.29E+07 | 7.19E+07 | 2.49E+08 | 28 |
| 53 | $\alpha$ _defensin_4     | 1.00E+04 | 4.58E+07 | 1.08E+08 | 21 | 1.00E+04 | 6.18E+07 | 1.47E+08 | 23 | 1.00E+04 | 1.76E+07 | 8.91E+07 | 18 |
| 54 | Sum_ $\alpha$ _defensins | 1.97E+08 | 6.14E+08 | 1.30E+09 | 35 | 1.97E+08 | 6.94E+08 | 1.73E+09 | 34 | 2.48E+08 | 6.33E+08 | 1.26E+09 | 35 |
| 55 | PRP1_2P                  | 4.80E+09 | 8.92E+09 | 1.37E+10 | 35 | 6.18E+09 | 9.56E+09 | 1.66E+10 | 36 | 3.20E+09 | 6.42E+09 | 1.04E+10 | 36 |
| 56 | PRP1_1P                  | 6.79E+08 | 1.22E+09 | 1.71E+09 | 34 | 4.40E+08 | 8.09E+08 | 1.89E+09 | 35 | 4.35E+08 | 7.13E+08 | 9.39E+08 | 36 |
| 57 | PRP1_0P                  | 1.00E+04 | 1.00E+04 | 8.23E+07 | 16 | 1.00E+04 | 1.00E+04 | 9.33E+07 | 17 | 1.00E+03 | 1.00E+03 | 7.07E+07 | 36 |
| 58 | PRP1_3P                  | 1.00E+04 | 1.00E+04 | 1.43E+08 | 14 | 1.00E+04 | 1.00E+04 | 1.83E+08 | 17 | 6.40E+07 | 1.36E+08 | 2.60E+08 | 28 |

|    |                         |          |          |          |    |          |          |          |    |          |          |          |    |
|----|-------------------------|----------|----------|----------|----|----------|----------|----------|----|----------|----------|----------|----|
| 59 | Sum_PRP1                | 5.28E+09 | 1.10E+10 | 1.76E+10 | 35 | 6.91E+09 | 1.10E+10 | 1.99E+10 | 36 | 3.74E+09 | 7.24E+09 | 1.15E+10 | 36 |
| 60 | PRP3_2P                 | 1.16E+09 | 2.39E+09 | 4.30E+09 | 34 | 1.23E+09 | 2.86E+09 | 4.96E+09 | 34 | 1.30E+09 | 2.15E+09 | 3.21E+09 | 36 |
| 61 | PRP3_1P                 | 2.06E+08 | 4.52E+08 | 7.14E+08 | 33 | 2.31E+08 | 4.92E+08 | 8.36E+08 | 32 | 1.27E+08 | 2.85E+08 | 3.95E+08 | 35 |
| 62 | PRP3_0P                 | 1.00E+04 | 1.00E+04 | 2.44E+08 | 10 | 1.00E+04 | 1.00E+04 | 3.64E+08 | 13 | 1.00E+04 | 9.63E+05 | 1.86E+07 | 18 |
| 63 | PRP_3_diphos_Des_Arg106 | 1.00E+04 | 3.22E+08 | 9.42E+08 | 23 | 1.00E+04 | 6.87E+07 | 8.52E+08 | 19 | 2.27E+08 | 4.54E+08 | 1.00E+09 | 36 |
| 64 | Sum_PRP3                | 2.09E+09 | 3.76E+09 | 5.75E+09 | 36 | 2.79E+09 | 3.88E+09 | 6.32E+09 | 36 | 1.96E+09 | 2.95E+09 | 4.23E+09 | 36 |
| 65 | P_C_peptide             | 9.74E+08 | 1.71E+09 | 2.64E+09 | 36 | 1.30E+09 | 2.44E+09 | 4.31E+09 | 36 | 1.43E+09 | 2.03E+09 | 3.10E+09 | 35 |
| 66 | Statherin_2P            | 4.66E+08 | 1.17E+09 | 2.27E+09 | 32 | 1.14E+09 | 2.23E+09 | 3.84E+09 | 35 | 5.98E+08 | 2.10E+09 | 3.22E+09 | 36 |
| 67 | Statherin_1P            | 1.77E+07 | 3.09E+07 | 5.49E+07 | 28 | 2.86E+07 | 4.83E+07 | 1.03E+08 | 29 | 1.00E+04 | 3.40E+07 | 5.12E+07 | 26 |
| 68 | Statherin_0P            | 1.00E+04 | 1.00E+04 | 1.00E+04 | 4  | 1.00E+04 | 1.00E+04 | 1.00E+04 | 3  | 1.00E+04 | 1.00E+04 | 1.00E+04 | 3  |
| 69 | Sum_Statherin           | 4.98E+08 | 1.18E+09 | 2.31E+09 | 32 | 1.18E+09 | 2.34E+09 | 3.92E+09 | 35 | 6.03E+08 | 2.14E+09 | 3.30E+09 | 36 |
| 70 | PB_peptide              | 1.16E+09 | 2.54E+09 | 3.37E+09 | 35 | 1.89E+09 | 2.62E+09 | 4.61E+09 | 36 | 9.43E+08 | 1.53E+09 | 2.88E+09 | 36 |
| 71 | SLPI                    | 1.00E+04 | 1.00E+04 | 1.35E+07 | 10 | 1.00E+04 | 1.00E+04 | 4.81E+07 | 12 | 1.00E+04 | 1.37E+07 | 3.99E+07 | 23 |



**Table S4.** Scores of the Boruta algorithm for the selection of the components for RF analysis, highlighted by color tones ranging from dark to light green. N refers to the list position of the same components in Tables 2 and S3.

| HCs-AIHp mixed data set |                          |              | HCs-PBCp mixed data set |                           |              | AIHp-PBCp mixed data set |                         |              |
|-------------------------|--------------------------|--------------|-------------------------|---------------------------|--------------|--------------------------|-------------------------|--------------|
| N                       | Description              | Boruta score | N                       | Description               | Boruta score | N                        | Description             | Boruta score |
| 34                      | Cystatin_S1_ox           | 11.1         | 39                      | Sum_Cystatin_S_S1_S2      | 11.7         | 63                       | PRP_3_diphos_Des_Arg106 | 11.4         |
| 11                      | Sum_S100A9_s_ox_and_p_ox | 6.6          | 38                      | Sum_Cystatin_S2           | 9.6          | 30                       | Cystatin_S2             | 7.4          |
| 46                      | Hst_5                    | 6.3          | 30                      | Cystatin_S2               | 8.9          | 47                       | Hst_3                   | 6.8          |
| 12                      | Sum_S100A9_s             | 6.2          | 37                      | Sum_Cystatin_S1           | 7.4          | 39                       | Sum_Cystatin_S_S1_S2    | 6.5          |
| 8                       | Sum_S100A9_s_and_ox      | 6            | 29                      | Cystatin_S1               | 6.7          | 70                       | PB_peptide              | 5.4          |
| 3                       | S100A7D27                | 5.8          | 61                      | PRP3_1P                   | 5.2          | 37                       | Sum_Cystatin_S1         | 5.3          |
| 48                      | Sum_Hst_3                | 5.6          | 27                      | Cystatin_D_de s_1_5       | 4.5          | 62                       | PRP3_0P                 | 5.1          |
| 26                      | Cystatin_C               | 5.4          | 63                      | PRP_3_diphos_Des_Arg106   | 4.5          | 16                       | Sum_S100A9_l_g          | 5            |
| 4                       | S100A9_s                 | 5.2          | 34                      | Cystatin_S1_o x           | 4.2          | 28                       | Cystatin_S              | 4.4          |
| 16                      | Sum_S100A9_l_g           | 4.7          | 31                      | Cystatin_SN               | 4.1          | 46                       | Hst_5                   | 4.3          |
| 45                      | Hst_6                    | 4.6          | 28                      | Cystatin_S                | 3.9          | 61                       | PRP3_1P                 | 4.2          |
| 49                      | Sum_Hst                  | 4.3          | 12                      | Sum_S100A9_s              | 3.1          | 29                       | Cystatin_S1             | 4.1          |
| 9                       | Sum_S100A9_s_and_s_p     | 4.3          | 11                      | Sum_S100A9_s_ox_and_p_o x | 2.9          | 13                       | S100A9_l_g              | 3.6          |
| 36                      | Cystatin_SN_ox           | 4            | 8                       | Sum_S100A9_s_and_ox       | 2.8          | 38                       | Sum_Cystatin_S2         | 2.3          |
| 5                       | S100A9_s_ox              | 3.9          | 62                      | PRP3_0P                   | 2.7          |                          |                         |              |
| 17                      | Cystatin_A               | 2            | 70                      | PB_peptide                | 2.7          |                          |                         |              |
| 53                      | $\alpha$ _defensin_4     | 1.8          | 40                      | Sum_Cystatin_SN           | 2            |                          |                         |              |
